# Supplementary material
Source: publisher site journal article supplement (https://www.dovepress.com/article/576607)
Supplement: Supplementary file 1 [file 576607_Supplementary%20Material-.docx]

**
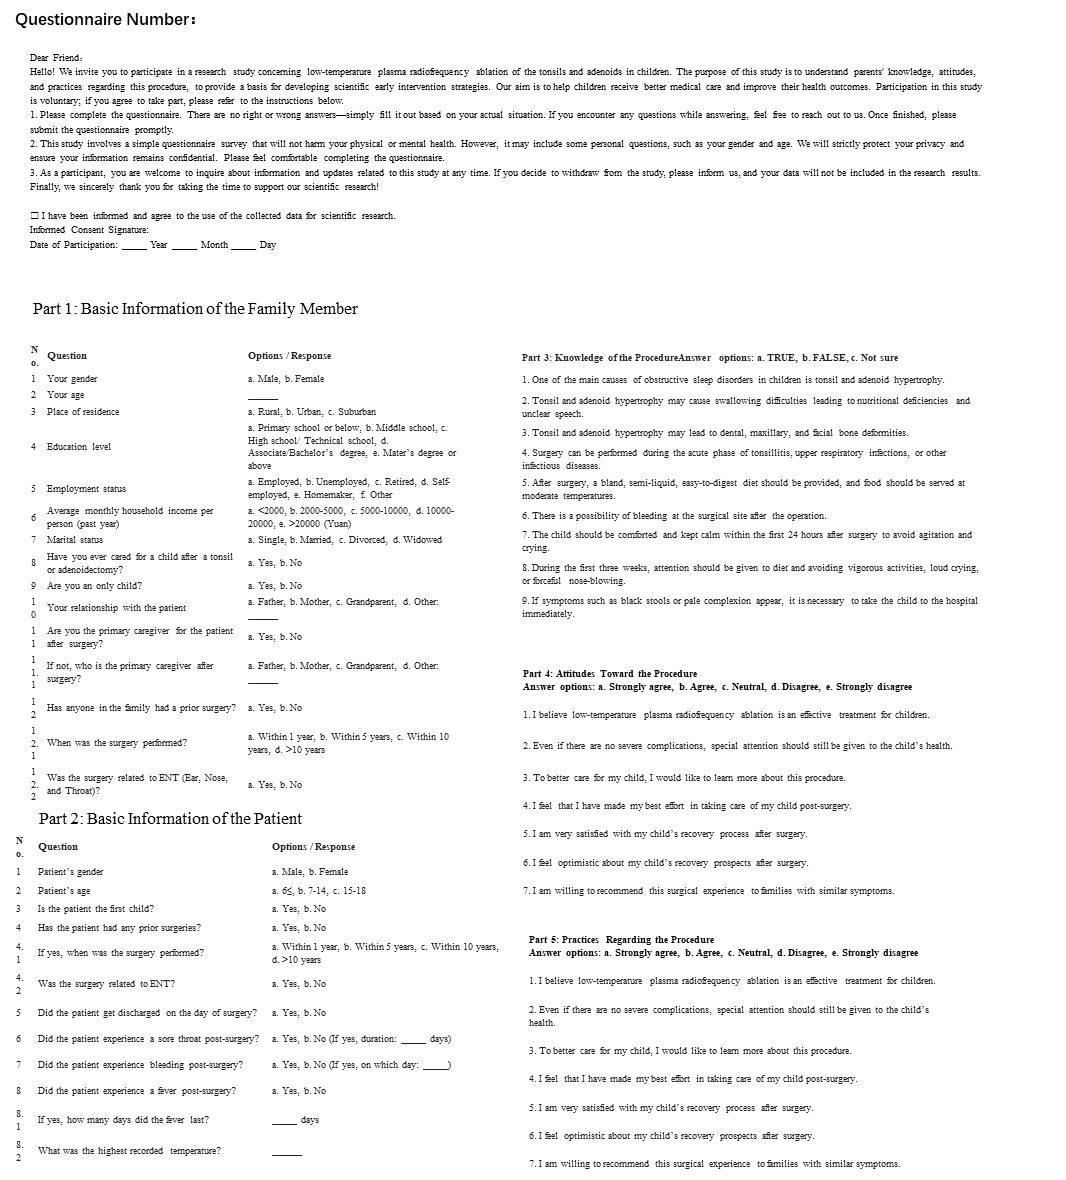
Figure S1 Parental Knowledge, Attitude, and Practice (KAP) questionnaire regarding low-temperature plasma adenotonsillectomy for children.**

**
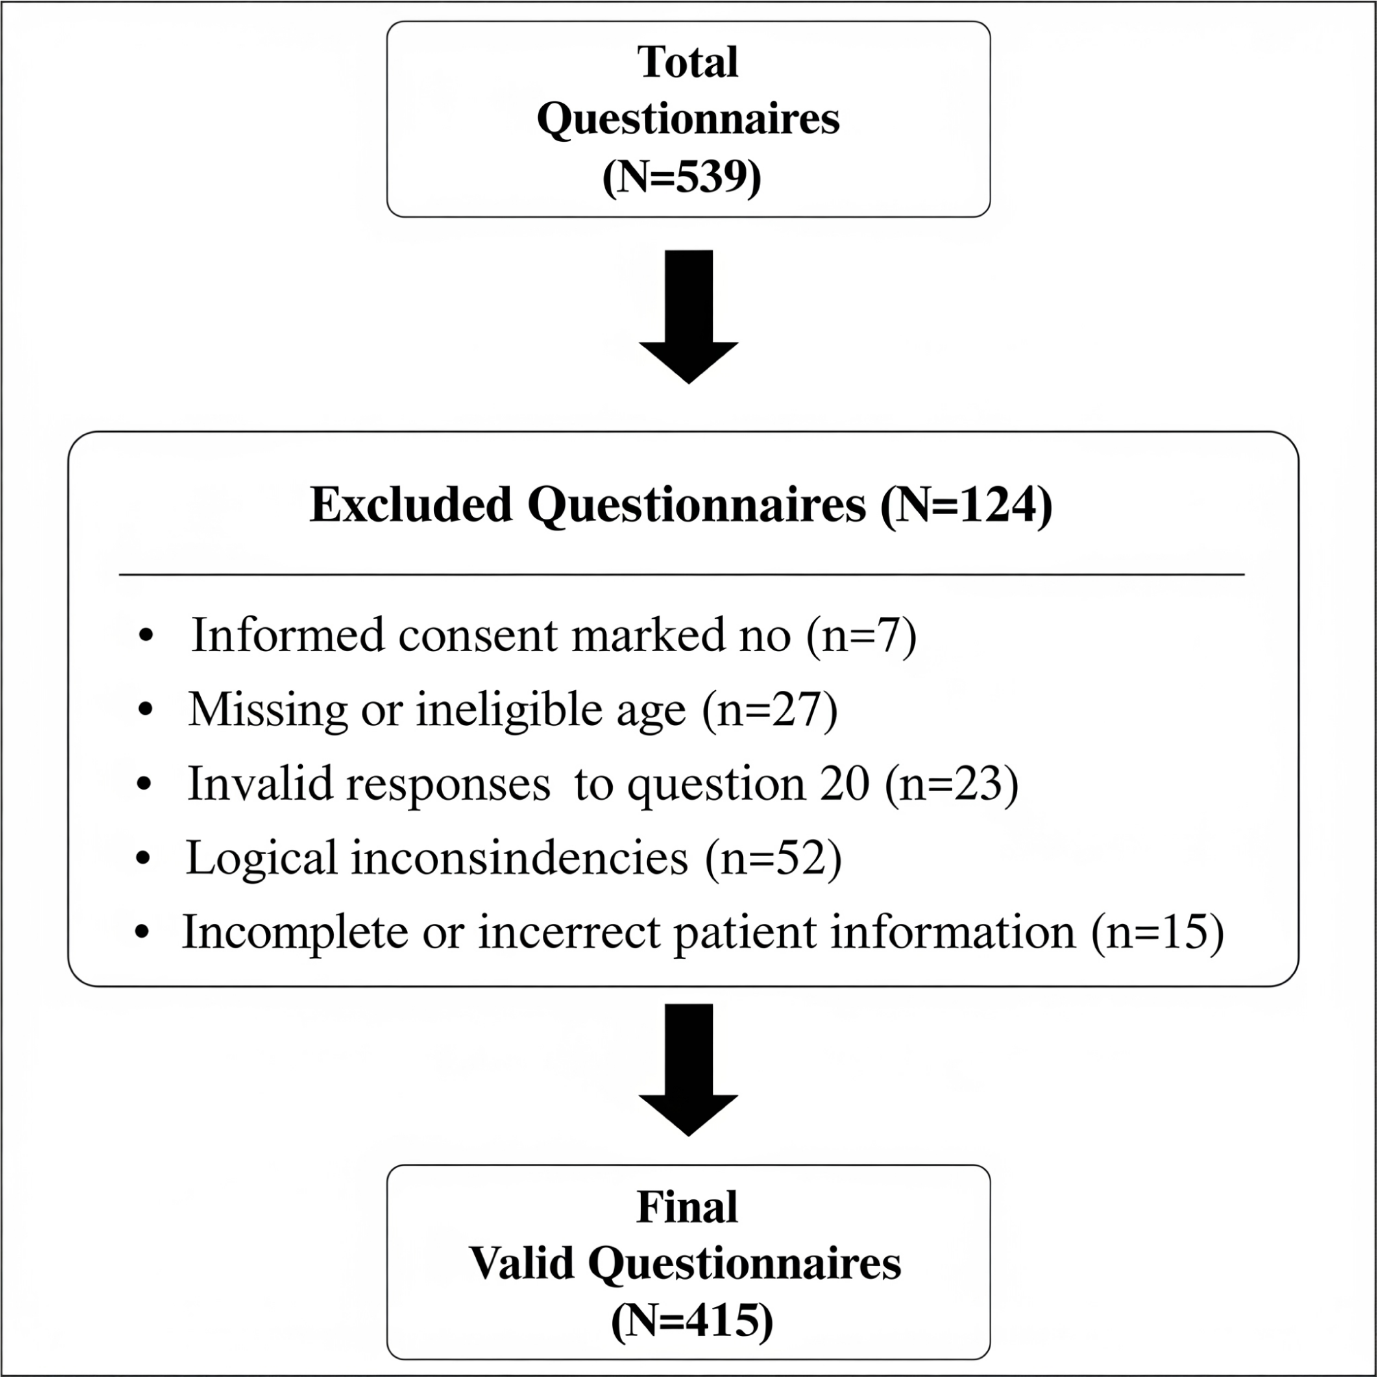
**

**Figure S2 Flowchart of the participant selection and questionnaire validation process.**

Table S1. Knowledge, Attitude, Practice dimension of the participants.

| **Knowledge** | | | | | **TRUE n(%)** |
| --- | --- | --- | --- | --- | --- |
| **1. One of the main causes of obstructive sleep disorders in children is tonsil and adenoid hypertrophy.** | | | | | 380 (91.57) |
| **2. Tonsil and adenoid hypertrophy may cause swallowing difficulties leading to nutritional deficiencies and unclear speech.** | | | | | 240 (57.83) |
| **3. Tonsil and adenoid hypertrophy may lead to dental, maxillary, and facial bone deformities.** | | | | | 358 (86.27) |
| **4. Surgery can be performed during the acute phase of tonsillitis, upper respiratory infections, or other infectious diseases.** | | | | | 115 (27.71) |
| **5. After surgery, a bland, semi-liquid, easy-to-digest diet should be provided, and food should be served at moderate temperatures, neither too cold nor too hot.** | | | | | 408 (98.31) |
| **6. There is a possibility of bleeding at the surgical site after the operation.** | | | | | 381 (91.81) |
| **7. The child should be comforted and kept calm within the first 24 hours after surgery to avoid agitation and crying.** | | | | | 410 (98.80) |
| **8. During the first three weeks post-surgery, attention should be given to an appropriate diet, avoiding vigorous activities, loud crying, and prompt treatment of sinusitis and prevention of colds to avoid actions such as forceful nose-blowing, throat clearing, and coughing, which may cause bleeding at the wound site.** | | | | | 404 (97.35) |
| **9.** **If symptoms such as black stools or pale complexion, which may indicate anemia, appear, it is necessary to take the child to the hospital immediately.** | | | | | 397 (95.66) |
| **Attitude** | **Strongly agree n(%)** | **Agree n(%)** | **Neutral n(%)** | **Disagree n(%)** | **Strongly disagree n(%)** |
| **I believe low-temperature plasma radiofrequency ablation of the tonsils and adenoids is an effective treatment for children.** | 227 (54.70) | 168 (40.48) | 17 (4.10) | 3 (0.72) | 0 |
| **I believe that, even if there are no severe complications post-surgery, special attention should still be given to the child’s health.** | 287 (69.16) | 116 (27.95) | 10 (2.41) | 1 (0.24) | 1 (0.24) |
| **To better care for my child, I would like to learn more about low-temperature plasma radiofrequency ablation of the tonsils and adenoids in children.** | 297 (71.57) | 114 (27.47) | 4 (0.96) | 0 | 0 |
| **I feel that I have made my best effort in taking care of my child post-surgery.** | 249 (60.00) | 154 (37.11) | 12 (2.89) | 0 | 0 |
| **I am very satisfied with my child’s recovery process after surgery.** | 215 (51.81) | 165 (39.76) | 32 (7.71) | 3 (0.72) | 0 |
| **I feel optimistic about my child’s recovery prospects after surgery.** | 233 (56.14) | 157 (37.83) | 24 (5.78) | 1 (0.24) | 0 |
| **I am willing to recommend this surgical experience to families with children experiencing similar symptoms.** | 233 (56.14) | 164 (39.52) | 17 (4.10) | 1 (0.24) | 0 |
| **Practice** | **Strongly agree n(%)** | **Agree n(%)** | **Neutral n(%)** | **Disagree n(%)** | **Strongly disagree n(%)** |
| **1. I fully completed the preoperative preparation according to the healthcare provider’s instructions.** | 287 (69.16) | 127 (30.60) | 1 (0.24) | 0 | 0 |
| **2. For 14 days after the surgery, I regularly took my child’s temperature.** | 194 (46.75) | 166 (40.00) | 49 (11.81) | 6 (1.45) | 0 |
| **3. For 14 days after the surgery, my child was on a semi-liquid diet every day.** | 226 (54.46) | 144 (34.70) | 40 (9.64) | 5 (1.20) | 0 |
| **4. For 14 days after the surgery, I consistently prevented my child from engaging in vigorous activities like running and jumping.** | 272 (65.54) | 129 (31.08) | 4 (0.96) | 6 (1.45) | 4 (0.96) |
| **5. For 14 days after the surgery, I did not allow my child to use items like straws or pacifiers.** | 283 (68.19) | 112 (26.99) | 13 (3.13) | 7 (1.69) | 0 |
| **6. I supervised my child to ensure they took their medication as prescribed post-surgery.** | 278 (66.99) | 131 (31.57) | 5 (1.20) | 1 (0.24) | 0 |
| **7. I brought my child back for follow-up appointments on time as instructed by the doctor.** | 299 (72.05) | 114 (27.47) | 2 (0.48) | 0 | 0 |

Table S2. Logistic regression for parental knowledge regarding low-temperature plasma adenotonsillectomy for children with obstructive sleep apnea syndrome.

| **Variables** | **Univariate analysis** | | **Multivariable analysis** | |
| --- | --- | --- | --- | --- |
|  | **OR (95%CI)** | **P** | **OR (95%CI)** | **P** |
| **Gender** |  |  |  |  |
| Male | Ref. |  |  |  |
| Female | 1.252 (0.741,2.113) | 0.401 |  |  |
| **Age (years old)** |  |  |  |  |
| 20-29 | Ref. |  | Ref. |  |
| 30-39 | 0.514 (0.220,1.202) | 0.125 | 0.445 (0.187,1.059) | 0.067 |
| 40 or more | 0.324 (0.132,0.793) | 0.014 | 0.304 (0.122,0.760) | 0.011 |
| **Residence** |  |  |  |  |
| Rural | Ref. |  | Ref. |  |
| Urban | 0.610 (0.402,0.927) | 0.021 | 0.537 (0.347,0.831) | 0.005 |
| Suburban | 0.667 (0.359,1.239) | 0.200 | 0.545 (0.286,1.040) | 0.066 |
| **Education** |  |  |  |  |
| Middle school or below | Ref. |  | Ref. |  |
| High school/technical school | 1.308 (0.756,2.264) | 0.337 | 1.226 (0.694,2.167) | 0.483 |
| associate/bachelor’s degree and above | 1.650 (1.016,2.680) | 0.043 | 1.779 (1.066,2.971) | 0.028 |
| **Monthly household income per capita** |  |  |  |  |
| <5,000 | Ref. |  |  |  |
| 5,000-10,000 | 1.437 (0.893,2.312) | 0.135 |  |  |
| >10,000 | 1.566 (0.949,2.582) | 0.079 |  |  |
| **Experience of caring for a child after a tonsil or adenoidectomy** |  |  |  |  |
| Yes | 1.433 (0.945,2.174) | 0.091 |  |  |
| No | Ref. |  |  |  |
| **The primary caregiver for the patient after surgery** |  |  |  |  |
| Yes | 1.002 (0.588,1.706) | 0.995 |  |  |
| No | Ref. |  |  |  |
| **Patient’s gender** |  |  |  |  |
| Male | Ref. |  |  |  |
| Female | 1.009 (0.675,1.507) | 0.967 |  |  |
| **Patient’s age** |  |  |  |  |
| ≤6 | Ref. |  |  |  |
| 7 years old or above | 0.761 (0.515,1.124) | 0.170 |  |  |
| **Is the patient the first child** |  |  |  |  |
| Yes | 1.303 (0.881,1.927) | 0.185 |  |  |
| No | Ref. |  |  |  |
| **Discharged on the day of surgery** |  |  |  |  |
| Yes | 0.882 (0.574,1.357) | 0.569 |  |  |
| No | Ref. |  |  |  |
| **Sore throat post-surgery** |  |  |  |  |
| Yes | 1.157 (0.731,1.832) | 0.533 |  |  |
| No | Ref. |  |  |  |
| **Fever post-surgery** |  |  |  |  |
| Yes | 0.923 (0.626,1.361) | 0.687 |  |  |
| No | Ref. |  |  |  |

Table S3 Logistic regression for parental attitude regarding low-temperature plasma adenotonsillectomy for children with obstructive sleep apnea syndrome.

| **Variables** | **Univariate analysis** | | **Multivariable analysis** | |
| --- | --- | --- | --- | --- |
|  | **OR (95%CI)** | **P** | **OR (95%CI)** | **P** |
| **Knowledge score** | 1.325 (1.200,1.464) | <0.001 | 1.284 (1.156,1.427) | <0.001 |
| **Gender** |  |  |  |  |
| Male | Ref. |  |  |  |
| Female | 0.628 (0.306,1.288) | 0.204 |  |  |
| **Age (years old)** |  |  |  |  |
| 20-29 | Ref. |  |  |  |
| 30-39 | 1.068 (0.414,2.751) | 0.892 |  |  |
| 40 or more | 0.853 (0.314,2.319) | 0.755 |  |  |
| **Residence** |  |  |  |  |
| Rural | Ref. |  |  |  |
| Urban | 0.769 (0.463,1.277) | 0.310 |  |  |
| Suburban | 0.974 (0.446,2.127) | 0.946 |  |  |
| **Education** |  |  |  |  |
| Middle school or below | Ref. |  | Ref. |  |
| High school/technical school | 1.639 (0.897,2.994) | 0.108 | 1.356 (0.702,2.620) | 0.364 |
| associate/bachelor’s degree and above | 3.972 (2.201,7.168) | <0.001 | 2.748 (1.383,5.460) | 0.004 |
| **Monthly household income per capita** |  |  |  |  |
| <5,000 | Ref. |  | Ref. |  |
| 5,000-10,000 | 1.342 (0.783,2.300) | 0.284 | 0.705 (0.375,1.326) | 0.278 |
| >10,000 | 3.440 (1.739,6.806) | <0.001 | 1.837 (0.858,3.936) | 0.118 |
| **Experience of caring for a child after a tonsil or adenoidectomy** |  |  |  |  |
| Yes | 0.961 (0.581,1.588) | 0.875 |  |  |
| No | Ref. |  |  |  |
| **The primary caregiver for the patient after surgery** |  |  |  |  |
| Yes | 0.844 (0.429,1.662) | 0.625 |  |  |
| No | Ref. |  |  |  |
| **Patient’s gender** |  |  |  |  |
| Male | Ref. |  |  |  |
| Female | 1.046 (0.638,1.713) | 0.859 |  |  |
| **Patient’s age** |  |  |  |  |
| ≤6 | Ref. |  |  |  |
| 7 years old or above | 0.716 (0.441,1.164) | 0.178 |  |  |
| **Is the patient the first child** |  |  |  |  |
| Yes | 1.821 (1.129,2.939) | 0.014 | 1.377 (0.811,2.338) | 0.237 |
| No | Ref. |  | Ref. |  |
| **Discharged on the day of surgery** |  |  |  |  |
| Yes | 0.834 (0.486,1.431) | 0.511 |  |  |
| No | Ref. |  |  |  |
| **Sore throat post-surgery** |  |  |  |  |
| Yes | 0.723 (0.397,1.317) | 0.289 |  |  |
| No | Ref. |  |  |  |
| **Fever post-surgery** |  |  |  |  |
| Yes | 0.743 (0.459,1.202) | 0.226 |  |  |
| No | Ref. |  |  |  |

Table S4 Logistic regression for parental practice regarding low-temperature plasma adenotonsillectomy for children with obstructive sleep apnea syndrome.

| **Variables** | **Univariate analysis** | | **Multivariable analysis** | |
| --- | --- | --- | --- | --- |
|  | **OR (95%CI)** | **P** | **OR (95%CI)** | **P** |
| **Knowledge score** | 1.276 (1.162,1.402) | <0.001 | 1.018 (0.892,1.162) | 0.793 |
| **Attitude score** | 2.010 (1.741,2.320) | <0.001 | 1.993 (1.712,2.320) | <0.001 |
| **Gender** |  |  |  |  |
| Male | Ref. |  | Ref. |  |
| Female | 0.467 (0.229,0.952) | 0.036 | 0.677 (0.244,1.880) | 0.454 |
| **Age (years old)** |  |  |  |  |
| 20-29 | Ref. |  |  |  |
| 30-39 | 1.231 (0.521,2.910) | 0.636 |  |  |
| 40 or more | 0.940 (0.378,2.341) | 0.895 |  |  |
| **Residence** |  |  |  |  |
| Rural | Ref. |  |  |  |
| Urban | 0.858 (0.535,1.375) | 0.524 |  |  |
| Suburban | 1.064 (0.514,2.201) | 0.868 |  |  |
| **Education** |  |  |  |  |
| Middle school or below | Ref. |  | Ref. |  |
| High school/technical school | 1.557 (0.860,2.819) | 0.144 | 1.012 (0.436,2.350) | 0.978 |
| associate/bachelor’s degree and above | 2.313 (1.352,3.957) | 0.002 | 0.777 (0.337,1.790) | 0.553 |
| **Monthly household income per capita** |  |  |  |  |
| <5,000 | Ref. |  | Ref. |  |
| 5,000-10,000 | 1.582 (0.935,2.677) | 0.087 | 1.586 (0.720,3.492) | 0.252 |
| >10,000 | 1.938 (1.095,3.429) | 0.023 | 1.383 (0.581,3.294) | 0.464 |
| **Experience of caring for a child after a tonsil or adenoidectomy** |  |  |  |  |
| Yes | 1.102 (0.685,1.771) | 0.690 |  |  |
| No | Ref. |  |  |  |
| **The primary caregiver for the patient after surgery** |  |  |  |  |
| Yes | 0.701 (0.365,1.347) | 0.286 |  |  |
| No | Ref. |  |  |  |
| **Patient’s gender** |  |  |  |  |
| Male | Ref. |  |  |  |
| Female | 0.837 (0.531,1.318) | 0.442 |  |  |
| **Patient’s age** |  |  |  |  |
| ≤6 | Ref. |  |  |  |
| 7 years old or above | 0.899 (0.575,1.405) | 0.640 |  |  |
| **Is the patient the first child** |  |  |  |  |
| Yes | 1.954 (1.249,3.056) | 0.003 | 1.759 (0.946,3.270) | 0.074 |
| No | Ref. |  | Ref. |  |
| **Discharged on the day of surgery** |  |  |  |  |
| Yes | 0.833 (0.505,1.375) | 0.475 |  |  |
| No | Ref. |  |  |  |
| **Sore throat post-surgery** |  |  |  |  |
| Yes | 0.997 (0.589,1.689) | 0.992 |  |  |
| No | Ref. |  |  |  |
| **Fever post-surgery** |  |  |  |  |
| Yes | 0.958 (0.615,1.494) | 0.851 |  |  |
| No | Ref. |  |  |  |
